# Supplementary material
Source: Research Square preprint supplement (doi:10.21203/rs.3.rs-9102176/v1)
Supplement: Supplementary file 1 [file e944c4df2798d402826a7626.pdf]

## Supplementary figures

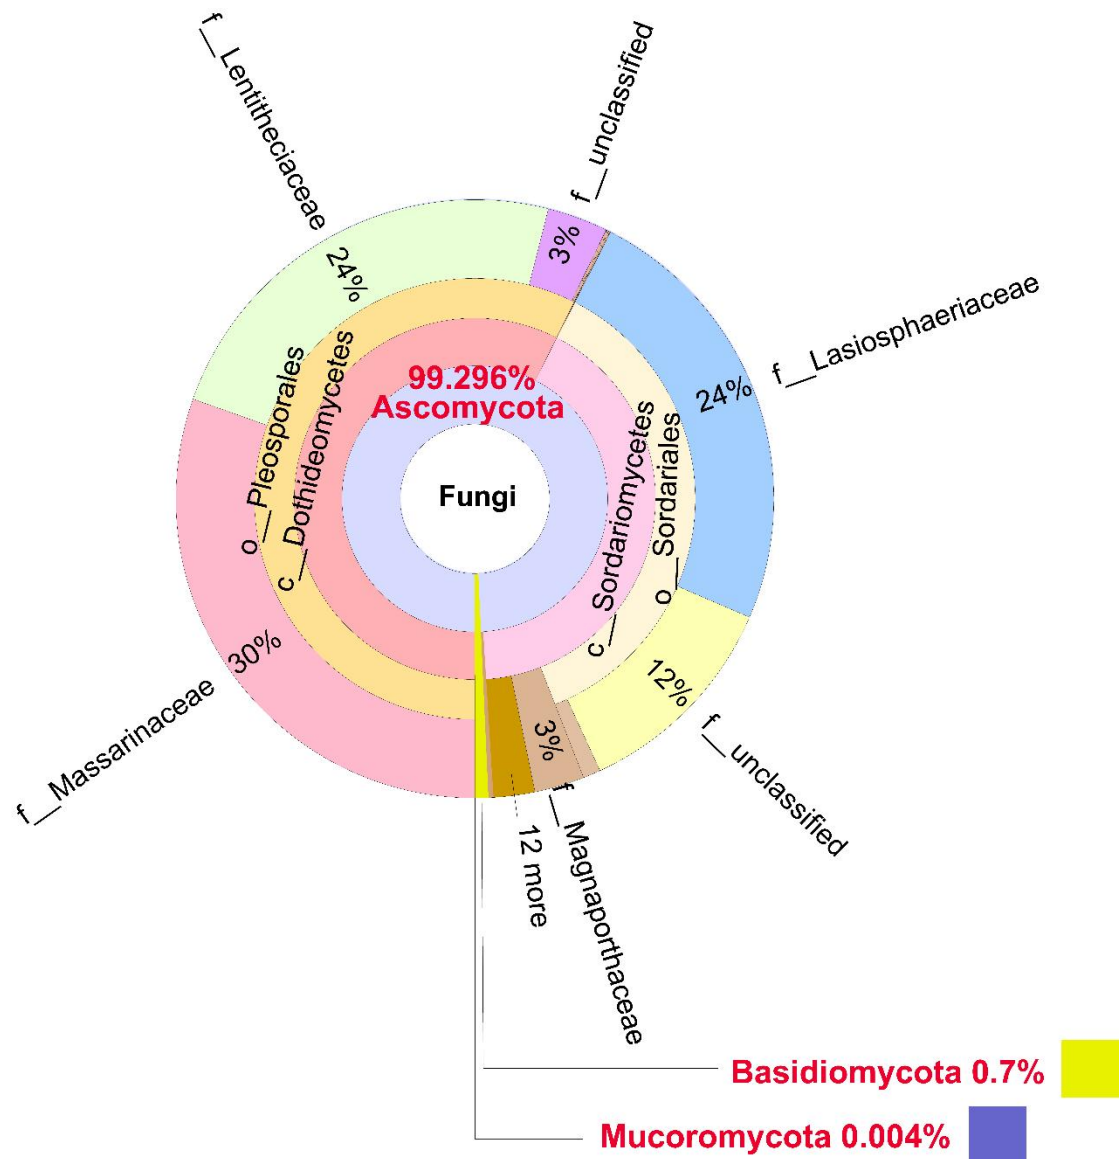

Fig. S1. Krona-based taxonomic classification of fungal ASVs (FASVs) in wild rice.

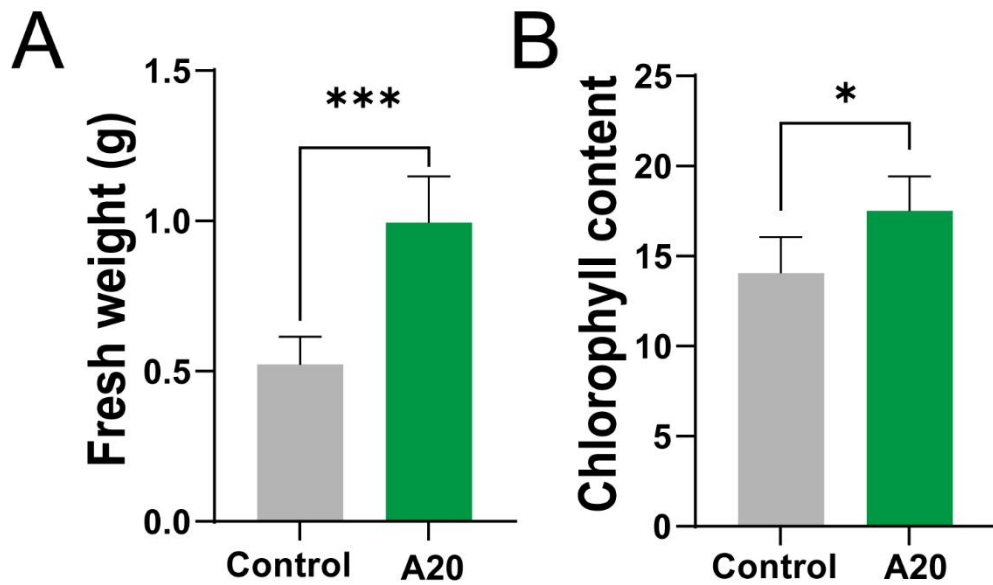

**Fig. S2. Growth indexes of *F. oryzae*-fertilized rice.** (A) Fresh weight. (B) Chlorophyll content. Bars show the means  $\pm$  SDs.

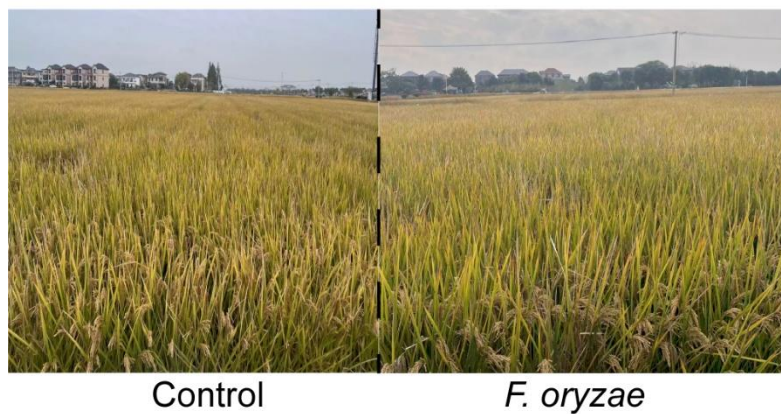

**Fig. S3. A field experiment of the impact of *F. oryzae* on rice was conducted in Hangzhou, China.**

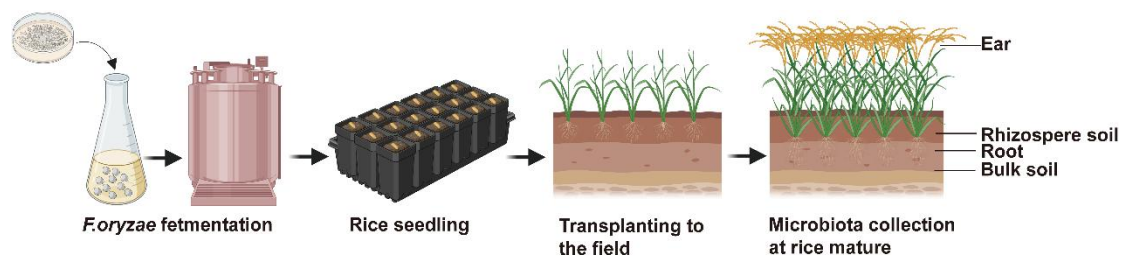

**Fig. S4. Schematic illustration for investigation on the impact of *F. oryzae* on rice microbiota.**

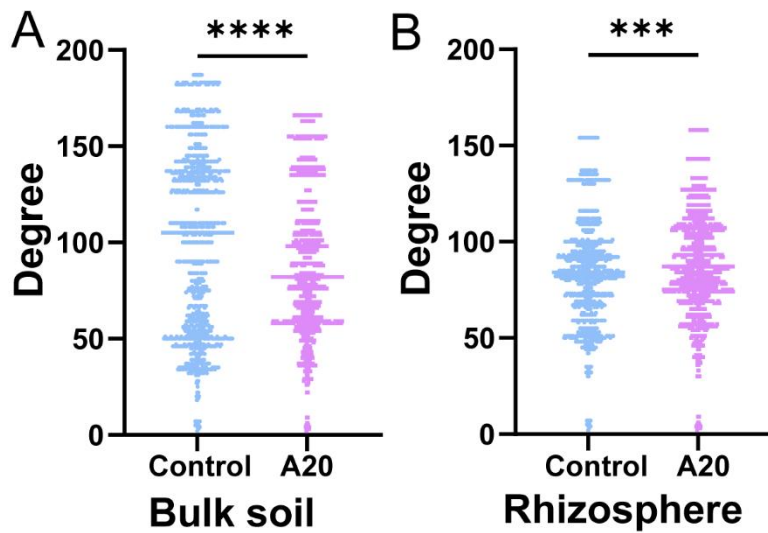

**Fig. S5. Node degree comparison in bulk soil and rhizosphere.** (A) In the bulk soil, the control network has higher complexity than the fertilized network. (B) In the rhizosphere, the fertilized network exhibited higher complexity than the control network. Significant difference (t-test): \*\*\*,  $p$ -value < 0.001, \*\*\*\*,  $p$ -value < 0.0001.

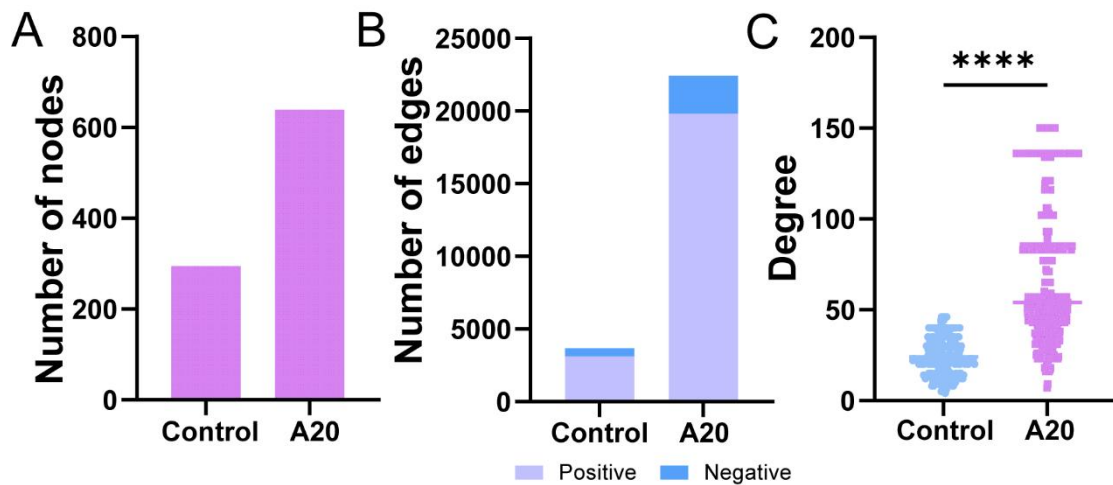

**Fig. S6. The number of nodes, edges, and the node degree in the root microbiota.** (A-C) The fertilized root network has higher complexity than the control network. Significant difference (t-test): \*\*\*\*,  $p$ -value < 0.0001.

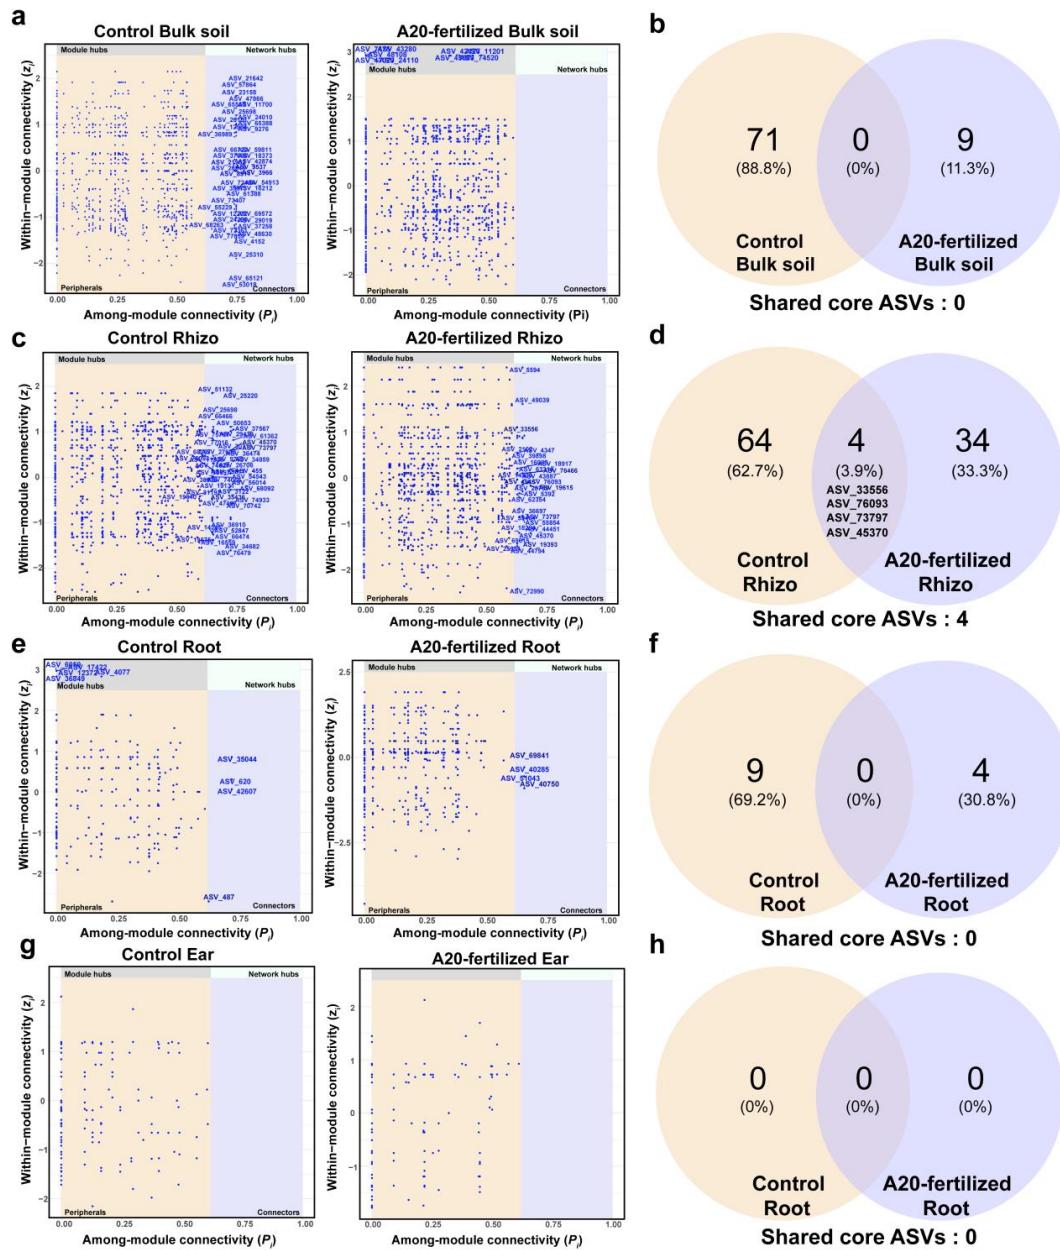

**Fi**

**g. S7.  $Z_i$ - $P_i$  plot of OTUs on different rice compartments variation (bulk soil, rhizosphere soil, root, and ear).** The  $Z_i$  (within-module connectivity) and  $P_i$  (among-module connectivity) of each OTU were calculated to identify key OTUs in the co-occurrence network. Nodes were ultimately divided into four categories: module hubs ( $Z_i > 2.5$ ), network hubs ( $Z_i > 2.5$  and  $P_i > 0.62$ ), connectors ( $P_i > 0.62$ ), and peripherals ( $Z_i < 2.5$  and  $P_i < 0.62$ ).

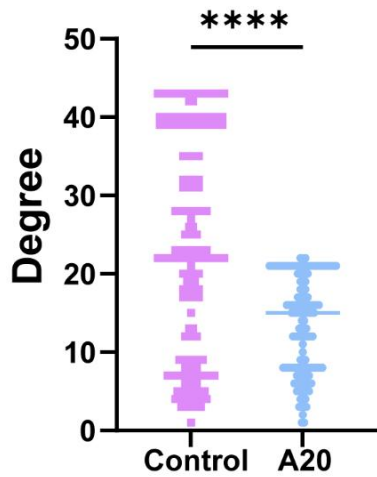

**Fig. S8. Node degree comparison in ears.** The control network has higher complexity than the fertilized network. Significant difference (*t*-test): \*\*\*\*,  $p$ -value < 0.0001.

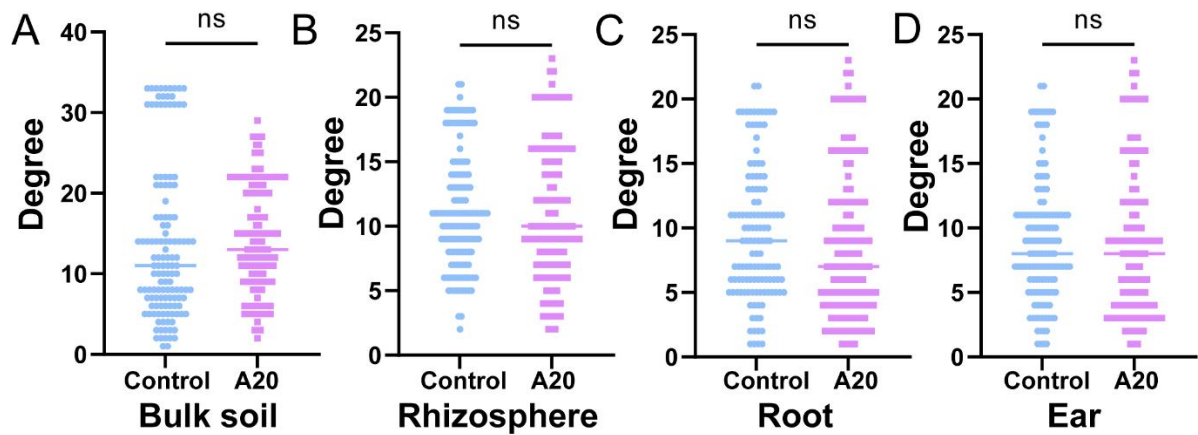

**Fig. S9. Node degree analysis of fungi.** (A-D) No significant differences in network connectivity among bulk soil, rhizosphere, root, and ear compartments between fertilized and control.

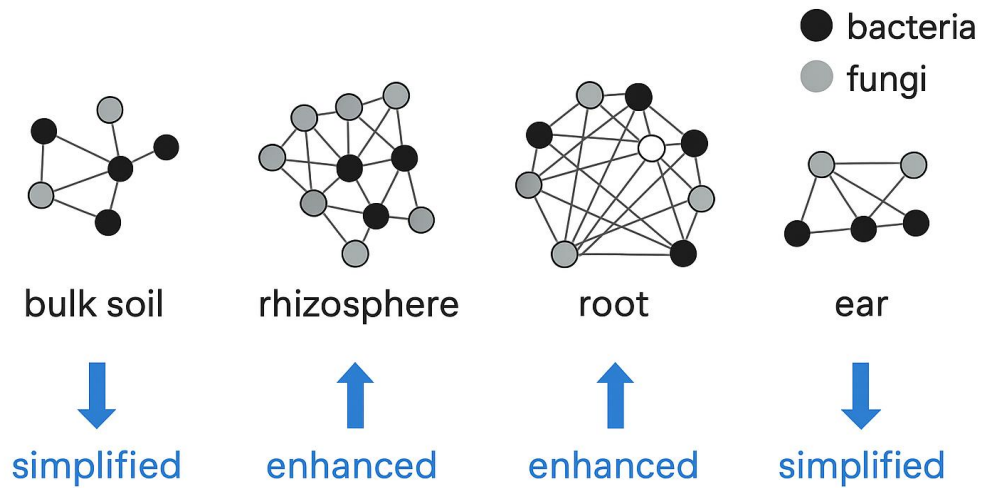

**Fig. S10. *F. oryzae* modulates rice microbiota in a compartment-specific manner.**

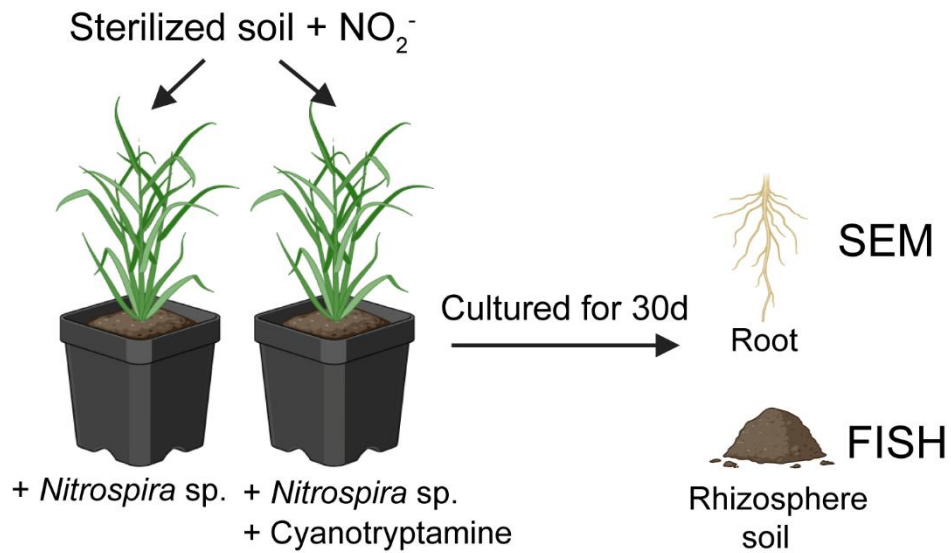

**Fig. S11. Schematic illustration for investigation on the impact of Cyanotryptamine on rice microbiota.**

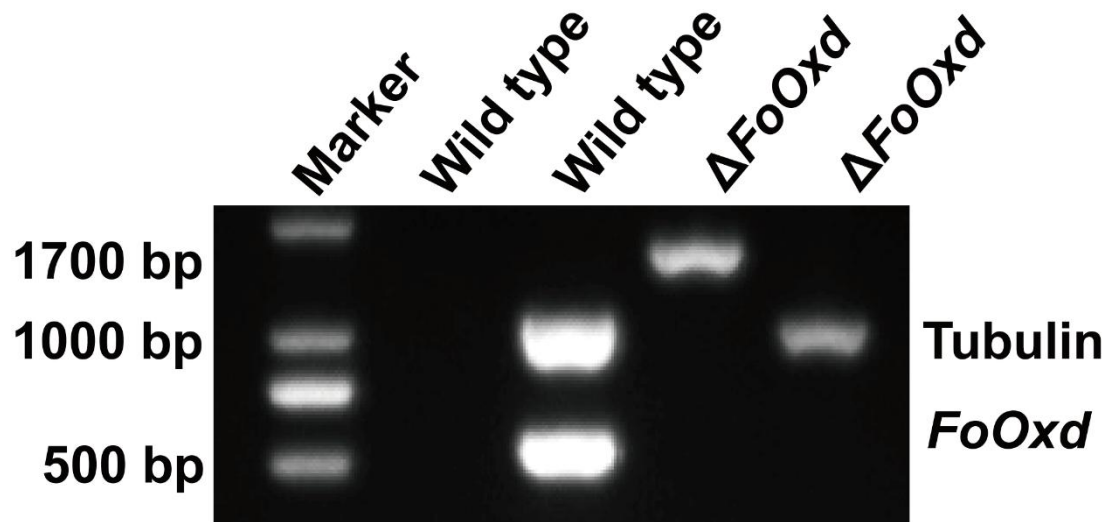

Fig. S12. PCR test the fragment *FoOxd*.
